# Supplementary material for: Using the Traditional Ex Vivo Whole Blood Model to Discriminate Bacteria by Their Inducible Host Responses
Source: MDPI journal article supplement (doi:10.3390/biomedicines12040724), 2024-03-25
Supplement: s1 [file s1]

**Supplementary Table S1. Bacterial strains used throughout this study**  
Isolate specific information of the eight bacterial strains used in this study

| Species                           | Strain | Source                                                                                                                                      | References                                                                                              |
|-----------------------------------|--------|---------------------------------------------------------------------------------------------------------------------------------------------|---------------------------------------------------------------------------------------------------------|
| <i>Escherichia coli</i>           | ECOR26 | Part of the ECOR collection, Human infant isolate, Commensal strain                                                                         | Ref 40: Ochman and Selander 1984                                                                        |
| <i>Escherichia coli</i>           | GMB10  | Non-clinical plant isolate (Spinach)                                                                                                        | Ref 39: Meric et al. 2013                                                                               |
| <i>Escherichia coli</i>           | K12    | Model laboratory strain<br>Descendent of a strain first isolated in 1922 from a stool sample                                                | Ref 41: Bachmann 1972<br>Ref 42: Gray and Tatum 1944<br>Ref 43: Lederberg 2004                          |
| <i>Escherichia coli</i>           | B      | Laboratory strain from pathology laboratory, Singleton Hospital, UK<br>Descendent of a strain originally isolated in 1918 and named in 1942 | Ref 44: Daegelen, 2009 and refs therein                                                                 |
| <i>Staphylococcus aureus</i>      | VAP39  | An MRSA, Cause of ventilator-associated pneumonia, UK isolate                                                                               | Ref 45: Conway Morris et al. 2009<br>Ref 46: Conway Morris et al. 2011<br>Ref 47: Wilkinson et al. 2012 |
| <i>Staphylococcus aureus</i>      | SH1000 | Representative laboratory strain of <i>S. aureus</i> , UK isolate, highly virulent derivative of NCTC 8325                                  | Ref 48: O'Neill 2010                                                                                    |
| <i>Staphylococcus epidermidis</i> | 1457   | Cause of central-venous catheter associated disease, Biofilm producer                                                                       | Ref 49: Mack et al 1992                                                                                 |
| <i>Staphylococcus epidermidis</i> | RP62A  | Isolated from a patient with intravascular catheter-associated infection, Biofilm producer                                                  | Ref 50: Christensen, 1982<br>Ref 51: Gill et al. 2005                                                   |

A)

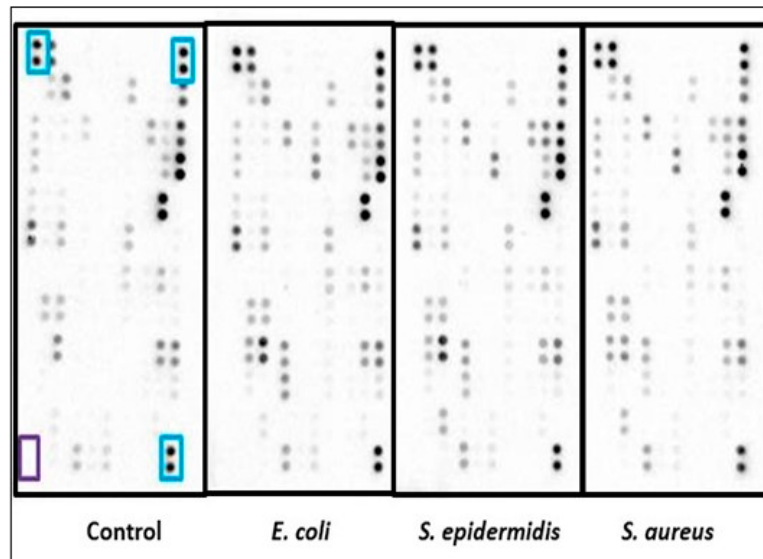

B)

| Mediator            | Control | K12     | RP62A   | SH1000  |
|---------------------|---------|---------|---------|---------|
| Vitamin D BP        | 2591.4  | 2162.8  | 3865    | 2390.4  |
| CD31                | 4061.4  | 2911.8  | 2343.2  | 3505    |
| TIM-3               | 2159.7  | 1947.6  | 1609.2  | 830.6   |
| VCAM-1              | 10542.4 | 10108.2 | 8925.8  | 11297.5 |
| Serpin E1           | 9492.6  | 12203.8 | 8952.4  | 15279.7 |
| SHBG                | 3738.8  | 3448.3  | 2801.9  | 2709.5  |
| Thrombospondin-1    | 3798.5  | 3781    | 3171.5  | 4171.2  |
| TNF- $\alpha$       | 538.5   | 5518.4  | 5565.1  | 4556.2  |
| Osteopontin         | 6821.7  | 6069.3  | 4286.5  | 5304.3  |
| PF4                 | 4200.8  | 3851.7  | 3553.9  | 4983.1  |
| RANTES              | 4482.5  | 3714.4  | 3750.8  | 3815.1  |
| RBP-4               | 7358.2  | 16338   | 10638.7 | 6582    |
| Resistin            | 1192.4  | 1195.4  | 3868.4  | 3139.8  |
| Lipocalin-2         | 2343.4  | 5846.9  | 5298.5  | 5471.2  |
| MIP-1 $\alpha$      | 10.6    | 6433.1  | 4111.4  | 3689.8  |
| MIP-3 $\alpha$      | 162     | 8870.6  | 3308.7  | 1899.4  |
| MMP-9               | 4348.7  | 4371.7  | 5330.9  | 5299.6  |
| IL-6                | 83.3    | 2559.3  | -4.5    | 886.1   |
| IL-8                | 201.7   | 8591.9  | 6912.6  | 6982.3  |
| Growth Hormone      | 2499.1  | 3165.4  | 2577.9  | 1911.5  |
| IGFBP-2             | 4201.7  | 3569.2  | 3240    | 2969.1  |
| IGFBP-3             | 2304.8  | 1776    | 1768.8  | 1661.3  |
| Endoglin            | 5953.3  | 6250.3  | 4506    | 3707.7  |
| Chitinase 3-like 1  | 24036.6 | 4459.2  | 9489.4  | 5380.3  |
| Complement factor D | 5828.8  | 4887.3  | 4549.8  | 3805.3  |
| C-reactive protein  | 25379   | 19983.4 | 20952.2 | 9169.7  |
| Cystatin C          | 3855    | 2736    | 2384.8  | 2424.7  |
| DPPIV               | 7916.3  | 4351.9  | 4202.8  | 2969.5  |
| Adiponectin         | 10784.1 | 7104.1  | 10800.9 | 8578.9  |
| Apolipoprotein A-I  | 13614.1 | 9024    | 18278.4 | 10572.3 |
| Angiogenin          | 22382.1 | 16179.4 | 20794.6 | 18757.9 |
| C5a                 | 7381.4  | 8614.3  | 8501    | 6704.1  |
| CD14                | 2096.8  | 1562.5  | 1912.4  | 1306.1  |

#### Supplementary Figure S1. Bacterial induced cytokine screen for biomarker identification.

Upper panel A) Platelet-poor plasma from blood infected with *E. coli* K12, *S. epidermidis* 1457 or *S. aureus* SH1000, for 6 hours (n=1 donor) was added to cytokine array of 102 soluble mediators. The blue boxes indicate the six positive reference spots on a single membrane, and the purple box (bottom left) indicates the position of the two negative reference spots. Lower panel B); Quantitative analysis of the 33/102 cytokines that were detected on the cytokine array. All proteins where two spots could be detected on at least one (of the four) membranes were scanned using ImageJ and values were converted to pixels. Values represent the mean pixel density of two protein spots minus the mean of the negative control spots (purple square). Grey rows indicate >3-fold difference between the control membrane and at least one of the bacteria treated membranes.

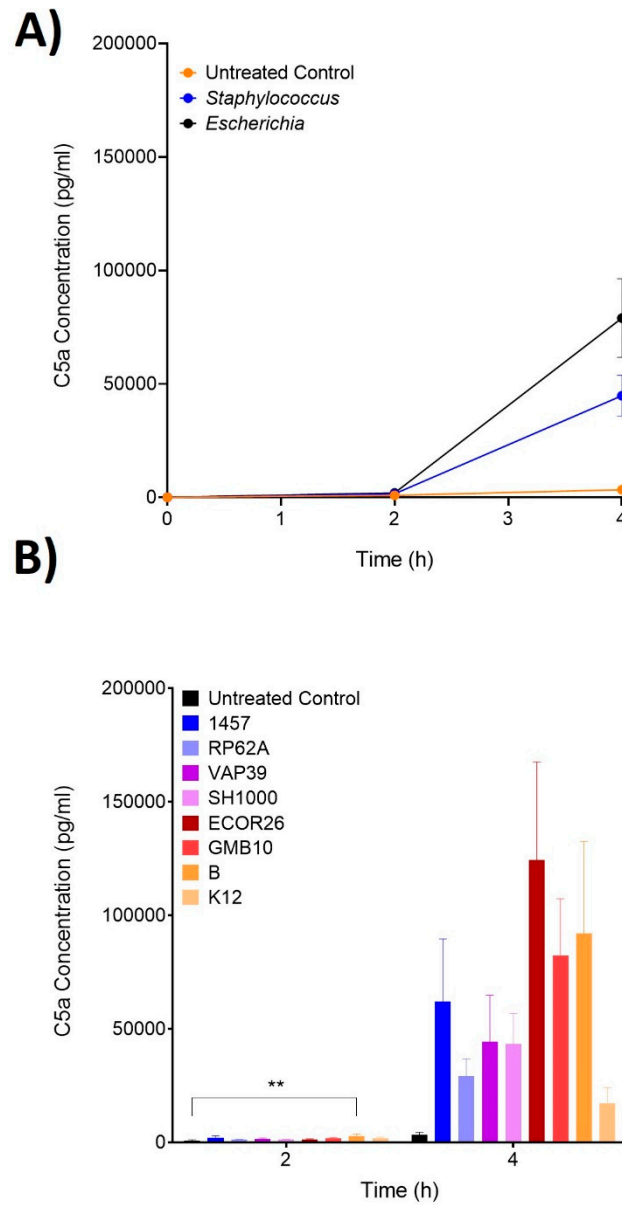

**Supplementary Figure S2. Changes in C5a following *ex vivo* infection.**

C5a was measured by ELISA after 2, 4 and 6 hours post-infection (n=5 donors). Plots show changes in C5a over time in response to A) Control, *Staphylococcus* and *Escherichia* genera and B) each strain at 2 and 4 hours (n = 5 donors). Error bars represent the mean  $\pm$  SEM.

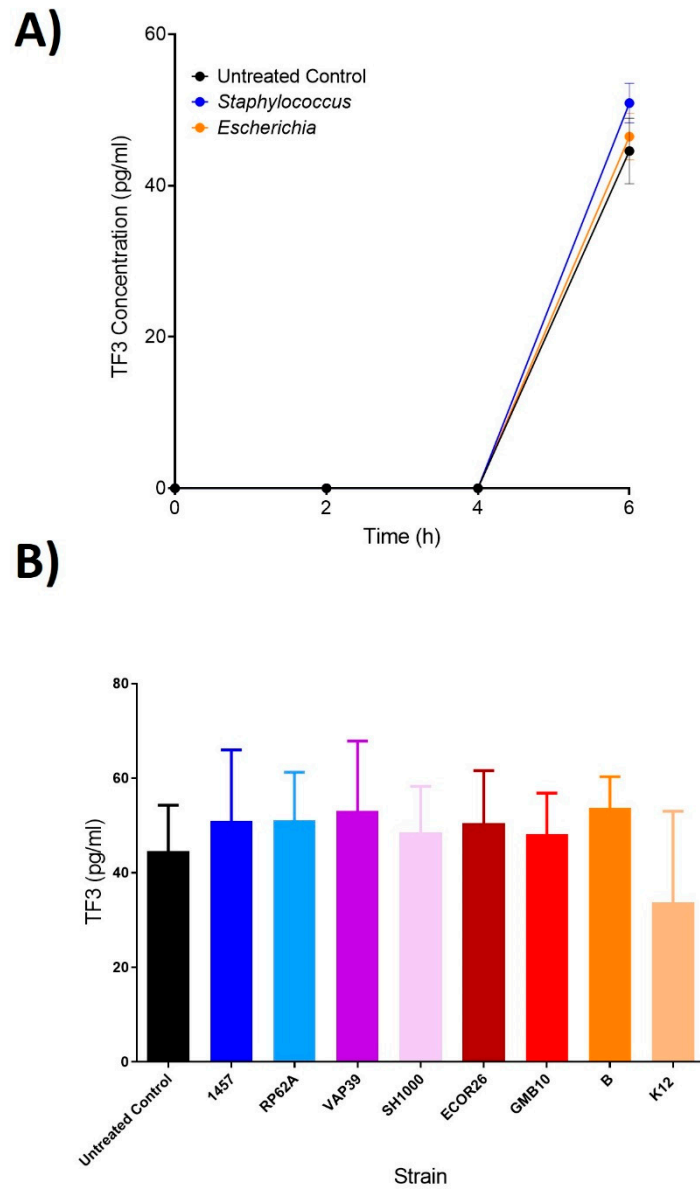

**Supplementary Figure S3. Changes in TF3 following *ex vivo* infection.**

TF3 was measured by ELISA after 2, 4 and 6 hours post-infection (n=5 donors). Plots show changes in C5a over time in response to A) Control, *Staphylococcus* and *Escherichia* genera and B) each strain at 6 hours (n = 5 donors). Error bars represent the mean  $\pm$  SEM.

**Supplementary Table S2. Linear Discriminant analysis of predicted and observed variables (strain level).**

Data generated in the *ex vivo* models were analysed, including the 10 inflammatory outputs over three timepoints. Table S2 confirms the predicted and observed outcomes for strains.

| Predicted | Observed (16/40, 40% correct) |   |       |        |       |     |       |        |       |
|-----------|-------------------------------|---|-------|--------|-------|-----|-------|--------|-------|
|           | Strain                        | B | E1457 | Ecor26 | GMB10 | K12 | RP62A | SH1000 | VAP39 |
|           | B                             | 4 | 0     | 0      | 0     | 1   | 0     | 0      | 0     |
|           | E1457                         | 0 | 0     | 0      | 1     | 2   | 2     | 0      | 0     |
|           | Ecor26                        | 1 | 0     | 2      | 2     | 0   | 0     | 0      | 0     |
|           | GMB10                         | 0 | 0     | 2      | 2     | 0   | 0     | 0      | 1     |
|           | K12                           | 2 | 1     | 1      | 1     | 0   | 0     | 0      | 0     |
|           | RP62A                         | 0 | 0     | 0      | 1     | 0   | 4     | 0      | 0     |
|           | SH1000                        | 0 | 0     | 0      | 0     | 0   | 2     | 3      | 0     |
|           | VAP39                         | 1 | 0     | 0      | 0     | 2   | 0     | 1      | 1     |

**Supplementary Table S3. Linear Discriminant analysis of predicted and observed variables (species level).**

Data generated in the *ex vivo* models were analysed, including the 10 inflammatory outputs over three timepoints. Table S3 confirms the predicted and observed outcomes for species.

| Predicted | Observed (36/40, 90% correct) |               |                 |                      |
|-----------|-------------------------------|---------------|-----------------|----------------------|
|           | Species                       | <i>E.coli</i> | <i>S.aureus</i> | <i>S.epidermidis</i> |
|           | <i>E.coli</i>                 | 19            | 0               | 1                    |
|           | <i>S.aureus</i>               | 0             | 8               | 2                    |
|           | <i>S.epidermidis</i>          | 0             | 1               | 9                    |

**Supplementary Table S4. Linear Discriminant analysis of predicted and observed variables (genera level).**

Data generated in the *ex vivo* models were analysed, including the 10 inflammatory outputs over three timepoints. Table S4 confirms the predicted and observed outcomes for genera.

| Predicted | Observed              |                    |                       |
|-----------|-----------------------|--------------------|-----------------------|
|           | Genera                | <i>Escherichia</i> | <i>Staphylococcus</i> |
|           | <i>Escherichia</i>    | 18                 | 2                     |
|           | <i>Staphylococcus</i> | 0                  | 20                    |
